# Supplementary material for: Identification of ROBO2 as a Potential Locus Associated with Inhaled Corticosteroid Response in Childhood Asthma
Source: MDPI journal article supplement (doi:10.3390/jpm11080733), 2021-07-28

## 1. Supplementary methods

### *1.1. Design and characteristics of the independent study included in the assessment of the association with the change in FEV1 after ICS use*

#### CAMP (n = 175)

Childhood Asthma Management Program (CAMP) is a longitudinal study initially designed as a clinical trial for the evaluation of the multiple side-effects of the long-term use of corticosteroids. Childhood patients (5-12 years old) with a clinical diagnosis of chronic asthma were included, whereas those subjects with severe asthma and other respiratory conditions were excluded [S1–3].

### *1.2. Design and characteristics of the studies included in association analyses with asthma exacerbations despite ICS use*

#### European populations

#### PACMAN (n = 654)

The Pharmacogenetics of Asthma medication in Children: Medication with Anti-inflammatory effects (PACMAN) study is an observational cohort including children (4-12 years old) with self-reported use of any asthma medications. Recruitment was carried out through records of community pharmacies in the Netherlands [S4].

#### PAGES (n = 437)

The Paediatric Asthma Gene Environment Study (PAGES) is a cross-sectional study that includes asthma patients (2-16 years old) with a pediatrician's diagnosis, recruited at secondary care clinics at different centers across the United Kingdom: Aberdeen, Edinburgh, Glasgow, Kilmarnock, and Brighton. Clinical assessment through questionnaires about dietary and quality of life was complimented, and saliva samples were collected. The coexistence of any respiratory diseases or significant health problems was considered as exclusion criteria [S5, S6].

#### BREATHE (n = 288)

The BREATHE study recruited participants aged 3 to 22 years old with a physician's diagnosis of asthma. Participants were recruited at primary and secondary care centers from the United Kingdom [S7–9]. From the BREATHE samples included, genotypes from 182 patients had been obtained using the Illumina Infinium CoreExome-24 BeadChip (Illumina) array, whereas 103 samples were genotyped using the Axiom™ Precision Medicine Research Array (Affymetrix Inc.) [S6]. Quality control procedures were applied as described in Hernandez-Pacheco *et al.* [S10]. Association analyses were performed for the latter together with PAGES samples due to similarities of study design and sample characteristics, denoted as BREATHE-PAGES [S6].

#### GoSHARE (n = 472)

The Genetic of the Scottish Health Research Register (GoSHARE) recruited children and young adults (3-18 years old) in Tayside (Scotland) through complete electronic medical records (EMR) available at databases from the National Health Service [S11].

#### PASS (n = 402)

The Pharmacogenetics of Adrenal Suppression with Inhaled Steroids study (PASS) includes children and young adults (5-18 years old) from the United Kingdom. Participants had a physician's diagnosis of asthma and were treated with inhaled corticosteroids (ICS) under medical supervision. Clinical concern about adrenal suppression was also considered as an inclusion criterion since this study was initially conceived to explore the effects of corticosteroids on adrenal suppression [S12, S13].

#### SLOVENIA (n = 182)

The SLOVENIA study recruited patients (5–18 years old) with a physician diagnosis of mild to moderate persistent asthma and hospital records at tertiary health centers in Slovenia. Part of the participants was regularly treated with ICS under medical supervision. The coexistence of other chronic inflammatory diseases was considered as an exclusion criterion [S14].

#### followMAGICS (n = 147)

Participants with persistent asthma symptoms from the follow-up phase of the Multicentre Asthma Genetics in Childhood Study (followMAGICS) were aged from 7 to 25 years old. Children with a physician's diagnosis of asthma were recruited at secondary and tertiary centers from Germany and Austria [S15–18].

#### ESTATe (n = 102)

Children and young adults (4–19 years old) with a physician's diagnosis of asthma were included in the case-control Effectiveness and Safety of Treatment with Asthma Therapy in children (ESTATe) study. Patients using any asthma controller medication were recruited at primary care units from the Netherlands based on electronic medical records [S10].

#### *Admixed populations*

#### GALA II (n = 854)

Genes-Environment and Admixture in Latino Americans (GALA II) is a case-control study including asthma patients (8–21 years old) with a physician's diagnosis, active symptoms, and reported use of any asthma medications recruited in the United States and Puerto Rico. Hispanic/Latino origin based on four grandparents belonging to that ancestry group was used as an inclusion criterion [S19].

#### SAGE (n = 493)

The Study of African Americans, Asthma, Genes, and Environments (SAGE) recruited asthma patients following the same protocols used in GALA II. Individuals with four grandparents of African American ancestry were recruited in several centers across the United States [S19, S20].

#### **Supplementary references**

- S1. Design and Implementation of a Patient Education Center for the Childhood Asthma Management Program. Childhood Asthma Management Program Research Group. *Ann Allergy Asthma Immunol* **1998**, *81* (6), 571–581.
- S2. The Childhood Asthma Management Program (CAMP): Design, Rationale, and Methods. Childhood Asthma Management Program Research Group. *Control Clin Trials* **1999**, *20* (1), 91–120.
- S3. Zeiger, R. S.; Dawson, C.; Weiss, S. Relationships between Duration of Asthma and Asthma Severity among Children in the Childhood Asthma Management Program (CAMP). *J Allergy Clin Immunol* **1999**, *103* (3 Pt 1), 376–387.
- S4. Koster, E. S.; Raaijmakers, J. A.; Koppelman, G. H.; Postma, D. S.; van der Ent, C. K.; Koenderman, L.; Bracke, M.; Maitland-van der Zee, A. H. Pharmacogenetics of Anti-Inflammatory Treatment in Children with Asthma: Rationale and Design of the PACMAN Cohort. *Pharmacogenomics* **2009**, *10* (8), 1351–1361.
- S5. Turner, S. W.; Ayres, J. G.; Macfarlane, T. V.; Mehta, A.; Mehta, G.; Palmer, C. N.; Cunningham, S.; Adams, T.; Aniruddhan, K.; Bell, C.; Corrigan, D.; Cunningham, J.; Duncan, A.; Hunt, G.; Leece, R.; MacFadyen, U.; McCormick, J.; McLeish, S.; Mitra, A.; Miller, D.; Waxman, E.; Webb, A.; Wojcik, S.; Mukhopadhyay, S.; Macgregor, D. A Methodology to Establish a Database to Study Gene

Environment Interactions for Childhood Asthma. *BMC Med Res Methodol* **2010**, *10*, 107.

- S6. Hernandez-Pacheco, N.; Vijverberg, S. J.; Herrera-Luis, E.; Li, J.; Sio, Y. Y.; Granell, R.; Corrales, A.; Maroteau, C.; Lethem, R.; Perez-Garcia, J.; Farzan, N.; Repnik, K.; Gorenjak, M.; Soares, P.; Karimi, L.; Schieck, M.; Perez-Mendez, L.; Berce, V.; Tavendale, R.; Eng, C.; Sardon, O.; Kull, I.; Mukhopadhyay, S.; Pirmohamed, M.; Verhamme, K. M.; Burchard, E. G.; Kabesch, M.; Hawcutt, D. B.; Melen, E.; Potocnik, U.; Chew, F. T.; Tantisira, K. G.; Turner, S.; Palmer, C. N.; Flores, C.; Pino-Yanes, M.; Maitland-van der Zee, A. H. Genome-Wide Association Study of Asthma Exacerbations despite Inhaled Corticosteroids Use. *Eur Respir J* **2020**, *57* (5), 2003388.
- S7. Palmer, C. N.; Doney, A. S.; Lee, S. P.; Murrie, I.; Ismail, T.; Macgregor, D. F.; Mukhopadhyay, S. Glutathione S-Transferase M1 and P1 Genotype, Passive Smoking, and Peak Expiratory Flow in Asthma. *Pediatrics* **2006**, *118* (2), 710–716.
- S8. Palmer, C. N.; Lipworth, B. J.; Lee, S.; Ismail, T.; Macgregor, D. F.; Mukhopadhyay, S. Arginine-16 Beta2 Adrenoceptor Genotype Predisposes to Exacerbations in Young Asthmatics Taking Regular Salmeterol. *Thorax* **2006**, *61* (11), 940–944.
- S9. Tavendale, R.; Macgregor, D. F.; Mukhopadhyay, S.; Palmer, C. N. A Polymorphism Controlling *ORMDL3* Expression Is Associated with Asthma That Is Poorly Controlled by Current Medications. *J Allergy Clin Immunol* **2008**, *121* (4), 860–863.
- S10. Hernandez-Pacheco, N.; Farzan, N.; Francis, B.; Karimi, L.; Repnik, K.; Vijverberg, S. J.; Soares, P.; Schieck, M.; Gorenjak, M.; Forno, E.; Eng, C.; Oh, S. S.; Perez-Mendez, L.; Berce, V.; Tavendale, R.; Samedy, L. A.; Hunstman, S.; Hu, D.; Meade, K.; Farber, H. J.; Avila, P. C.; Serebrisky, D.; Thyne, S. M.; Brigino-Buenaventura, E.; Rodriguez-Cintron, W.; Sen, S.; Kumar, R.; Lenoir, M.; Rodriguez-Santana, J. R.; Celedon, J. C.; Mukhopadhyay, S.; Potocnik, U.; Pirmohamed, M.; Verhamme, K. M.; Kabesch, M.; Palmer, C. N. A.; Hawcutt, D. B.; Flores, C.; Maitland-van der Zee, A. H.; Burchard, E. G.; Pino-Yanes, M. Genome-Wide Association Study of Inhaled Corticosteroid Response in Admixed Children with Asthma. *Clin Exp Allergy* **2019**, *49* (6), 789–798.
- S11. McKinstry, B.; Sullivan, F. M.; Vasishta, S.; Armstrong, R.; Hanley, J.; Haughney, J.; Philip, S.; Smith, B. H.; Wood, A.; Palmer, C. N. Cohort Profile: The Scottish Research Register SHARE. A Register of People Interested in Research Participation Linked to NHS Data Sets. *BMJ Open* **2017**, *7* (2), e013351.
- S12. Hawcutt, D. B.; Jorgensen, A. L.; Wallin, N.; Thompson, B.; Peak, M.; Lacy, D.; Newland, P.; Didi, M.; Couriel, J.; Blair, J.; Pirmohamed, M.; Smyth, R. L. Adrenal Responses to a Low-Dose Short Synacthen Test in Children with Asthma. *Clin Endocrinol* **2015**, *82* (5), 648–656.
- S13. Hawcutt, D. B.; Francis, B.; Carr, D. F.; Jorgensen, A. L.; Yin, P.; Wallin, N.; O'Hara, N.; Zhang, E. J.; Bloch, K. M.; Ganguli, A.; Thompson, B.; McEvoy, L.; Peak, M.; Crawford, A. A.; Walker, B. R.; Blair, J. C.; Couriel, J.; Smyth, R. L.; Pirmohamed, M. Susceptibility to Corticosteroid-Induced Adrenal Suppression: A Genome-Wide Association Study. *Lancet Respir Med* **2018**, *6*(6), 442–450.
- S14. Berce, V.; Kozmus, C. E.; Potocnik, U. Association among *ORMDL3* Gene Expression, 17q21 Polymorphism and Response to Treatment with Inhaled Corticosteroids in Children with Asthma. *Pharmacogenomics J* **2013**, *13* (6), 523–529.
- S15. Moffatt, M. F.; Kabesch, M.; Liang, L.; Dixon, A. L.; Strachan, D.; Heath, S.; Depner, M.; von Berg, A.; Bufer, A.; Rietschel, E.; Heinzmann, A.; Simma, B.; Frischer, T.; Willis-Owen, S. A.; Wong, K. C.; Illig, T.; Vogelberg, C.; Weiland, S. K.; von Mutius, E.; Abecasis, G. R.; Farrall, M.; Gut, I. G.; Lathrop, G. M.; Cookson, W. O. Genetic Variants Regulating *ORMDL3* Expression Contribute to the Risk of Childhood Asthma. *Nature* **2007**, *448* (7152), 470–473.
- S16. Pandey, R. C.; Michel, S.; Schieck, M.; Binia, A.; Liang, L.; Klopp, N.; Franke, A.; von Berg, A.; Bufer, A.; Rietschel, E.; Heinzmann, A.; Laub, O.; Simma, B.; Frischer, T.; Genuneit, J.; Illig, T.; Kabesch, M. Polymorphisms in Extracellular Signal-Regulated Kinase Family Influence Genetic Susceptibility to Asthma. *J Allergy Clin Immunol* **2013**, *131* (4), 1245–1247.
- S17. Schieck, M.; Michel, S.; Suttner, K.; Illig, T.; Zeilinger, S.; Franke, A.; Vogelberg, C.; von Berg, A.; Bufer, A.; Heinzmann, A.; Laub, O.; Rietschel, E.; Simma, B.; Frischer, T.; Genuneit, J.; Kerzel, S.; Kabesch, M. Genetic Variation in TH17 Pathway Genes, Childhood Asthma, and Total Serum IgE Levels. *J Allergy Clin Immunol* **2014**, *133* (3), 888–891.

- S18. Nieuwenhuis, M. A.; Siedlinski, M.; van den Berge, M.; Granell, R.; Li, X.; Niens, M.; van der Vlies, P.; Altmuller, J.; Nurnberg, P.; Kerkhof, M.; van Schayck, O. C.; Riemersma, R. A.; van der Molen, T.; de Monchy, J. G.; Bosse, Y.; Sandford, A.; Bruijnzeel-Koomen, C. A.; Gerth van Wijk, R.; Ten Hacken, N. H.; Timens, W.; Boezen, H. M.; Henderson, J.; Kabesch, M.; Vonk, J. M.; Postma, D. S.; Koppelman, G. H. Combining Genomewide Association Study and Lung EQTL Analysis Provides Evidence for Novel Genes Associated with Asthma. *Allergy* **2016**, *71* (12), 1712–1720.
- S19. Nishimura, K. K.; Galanter, J. M.; Roth, L. A.; Oh, S. S.; Thakur, N.; Nguyen, E. A.; Thyne, S.; Farber, H. J.; Serebrisky, D.; Kumar, R.; Brigino-Buenaventura, E.; Davis, A.; LeNoir, M. A.; Meade, K.; Rodriguez-Cintron, W.; Avila, P. C.; Borrell, L. N.; Bibbins-Domingo, K.; Rodriguez-Santana, J. R.; Sen, S.; Lurmann, F.; Balmes, J. R.; Burchard, E. G. Early-Life Air Pollution and Asthma Risk in Minority Children. The GALA II and SAGE II Studies. *Am J Respir Crit Care Med* **2013**, *188* (3), 309–318.
- S20. Neophytou, A. M.; White, M. J.; Oh, S. S.; Thakur, N.; Galanter, J. M.; Nishimura, K. K.; Pino-Yanes, M.; Torgerson, D. G.; Gignoux, C. R.; Eng, C.; Nguyen, E. A.; Hu, D.; Mak, A. C.; Kumar, R.; Seibold, M. A.; Davis, A.; Farber, H. J.; Meade, K.; Avila, P. C.; Serebrisky, D.; Lenoir, M. A.; Brigino-Buenaventura, E.; Rodriguez-Cintron, W.; Bibbins-Domingo, K.; Thyne, S. M.; Williams, L. K.; Sen, S.; Gilliland, F. D.; Gauderman, W. J.; Rodriguez-Santana, J. R.; Lurmann, F.; Balmes, J. R.; Eisen, E. A.; Burchard, E. G. Air Pollution and Lung Function in Minority Youth with Asthma in the GALA II & SAGE II Studies. *Am J Respir Crit Care Med* **2016**, *193*(11), 1271–1280.

**Table S1.** Clinical and demographic characteristics of the asthma patients treated with ICS from the CAMP study included in the evaluation of the association with the changes in FEV<sub>1</sub> after ICS therapy.

|                                                                | Total       | ICS<br>non-responders <sup>a</sup> | ICS<br>responders <sup>b</sup> | <i>p</i> -value                       |
|----------------------------------------------------------------|-------------|------------------------------------|--------------------------------|---------------------------------------|
| Sample size                                                    | 173         | 93                                 | 80                             | -                                     |
| Gender, n (% male)                                             | 98 (56.6)   | 52 (55.9)                          | 46 (57.5)                      | 0.960 <sup>i</sup>                    |
| Mean age ± SD (years)                                          | 8.9 ± 2.1   | 8.8 ± 1.9                          | 9.0 ± 2.3                      | 0.460 <sup>j</sup>                    |
| Lung function                                                  |             |                                    |                                |                                       |
| Mean basal FEV <sub>1</sub> ± SD (%) <sup>c</sup>              | 93.7 ± 14.8 | 98.7 ± 13.2                        | 87.9 ± 14.5                    | 6.47e-6 <sup>j</sup>                  |
| Mean post-treatment FEV <sub>1</sub> ± SD (%) <sup>d</sup>     | 99.5 ± 14.8 | 99.9 ± 13.0                        | 99.1 ± 16.8                    | 0.990 <sup>j</sup>                    |
| Mean ΔFEV <sub>1</sub> ± SD (%)                                | 5.8 ± 11.7  | 1.2 ± 3.8                          | 11.2 ± 15.1                    | 2.17 × 10 <sup>-12</sup> <sup>j</sup> |
| Asthma exacerbations in the last 12 months, n (%) <sup>e</sup> | 80 (46.5)   | 42 (45.2)                          | 38 (47.5)                      | 0.820 <sup>i</sup>                    |
| ER visits, n (%) <sup>f</sup>                                  | 42 (24.3)   | 22 (23.7)                          | 20 (25.0)                      | 0.980 <sup>i</sup>                    |
| OCS use, n (%) <sup>g</sup>                                    | 64 (37.2)   | 29 (31.2)                          | 35 (43.8)                      | 1 <sup>i</sup>                        |
| Hospitalizations, n (%) <sup>h</sup>                           | 13 (7.5)    | 7 (7.5)                            | 6 (7.5)                        | 0.780 <sup>i</sup>                    |

<sup>a</sup> Asthma patients with ΔFEV<sub>1</sub><8% after 2 months of ICS treatment; <sup>b</sup> Asthma patients with ΔFEV<sub>1</sub>≥8% after 2 months of ICS treatment; <sup>c</sup>FEV<sub>1</sub> measured before the beginning of ICS therapy; <sup>d</sup>FEV<sub>1</sub> measured after 2 months of ICS treatment; <sup>e</sup>Defined as any emergency room visits, use of oral corticosteroids and/or hospitalizations because of asthma; <sup>f</sup>Proportion of patients with any exacerbations who sought emergency care due to asthma; <sup>g</sup>Proportion of patients with any exacerbations who needed the use oral corticosteroids because of asthma; <sup>h</sup>Proportion of patients with any exacerbations who needed to be hospitalized because of asthma; <sup>i</sup>Pearson  $\chi^2$  test (df=1;  $\alpha$ =0.05); <sup>j</sup>Mann-Whitney U test.

FEV<sub>1</sub>: forced expiratory volume in one second; ΔFEV<sub>1</sub>: change in FEV<sub>1</sub> after 2 months of ICS treatment; SD: standard deviation; NA: not available.

**Table S2.** Genomic-region replication of *ROBO2* with asthma exacerbations despite ICS use in European populations. Evidence for significant variants after Bonferroni-like correction.

| SNP        | Chr. <sup>a</sup> | Position <sup>b</sup> | E/NE | OR (95% CI) <sup>c</sup> | <i>p</i> -value               |
|------------|-------------------|-----------------------|------|--------------------------|-------------------------------|
| rs72891542 | 3                 | 77183058              | T/C  | 4.21 (2.12 – 8.37)       | 3.96 × 10 <sup>-5</sup>       |
| rs72891545 | 3                 | 77186033              | A/G  | 4.79 (2.36 – 9.73)       | <b>1.44 × 10<sup>-5</sup></b> |
| rs80109563 | 3                 | 77189324              | T/C  | 6.38 (2.60 – 15.65)      | 5.26 × 10 <sup>-5</sup>       |
| rs77698848 | 3                 | 77191168              | A/G  | 6.06 (2.37 – 15.52)      | 1.72 × 10 <sup>-4</sup>       |
| rs75844835 | 3                 | 77192763              | G/T  | 9.02 (3.04 – 26.79)      | 7.53 × 10 <sup>-5</sup>       |
| rs75804244 | 3                 | 77193590              | A/G  | 6.47 (2.74 – 15.30)      | 2.11 × 10 <sup>-5</sup>       |
| rs75336627 | 3                 | 77197609              | A/G  | 4.95 (2.18 – 11.27)      | 1.38 × 10 <sup>-4</sup>       |
| rs77225325 | 3                 | 77199127              | A/C  | 4.95 (2.18 – 11.27)      | 1.38 × 10 <sup>-4</sup>       |
| rs76099377 | 3                 | 77199443              | G/A  | 4.95 (2.18 – 11.27)      | 1.38 × 10 <sup>-4</sup>       |
| rs7623806  | 3                 | 77201032              | C/T  | 4.95 (2.18 – 11.27)      | 1.38 × 10 <sup>-4</sup>       |
| rs72891555 | 3                 | 77205263              | G/T  | 4.94 (2.09 – 11.71)      | 2.82 × 10 <sup>-4</sup>       |

<sup>a</sup> Chromosome; <sup>b</sup> Positions based on GRCh37/hg19 build; <sup>c</sup> Odds ratio for the effect alleles.

CI: Confidence Interval; E: Effect allele; ICS: inhaled corticosteroids; NA: not available; NE: Non-effect allele; SNP: single-nucleotide polymorphism.

The most significant SNP is in boldface.

**Table S3.** Proteins with expression levels in plasma associated with rs1166980.

| Protein  | Beta   | SE    | p-value                 | Function(s)                                                                                | Previous association with asthma-related traits or allergic diseases <sup>a</sup> |
|----------|--------|-------|-------------------------|--------------------------------------------------------------------------------------------|-----------------------------------------------------------------------------------|
| OLFML3   | -0.135 | 0.033 | 4.68 × 10 <sup>-5</sup> | Protein-protein interactions, cell adhesion, intercellular interactions, early development | Yes                                                                               |
| PCSK3    | 0.123  | 0.033 | 2.04 × 10 <sup>-4</sup> | Protein processing, tumor progression, virus infection                                     | Yes                                                                               |
| CCDC80   | -0.115 | 0.033 | 4.90 × 10 <sup>-4</sup> | Cell adhesion, matrix assembly                                                             | Yes                                                                               |
| PI3      | -0.113 | 0.033 | 6.76 × 10 <sup>-4</sup> | Innate immune system                                                                       | Yes                                                                               |
| ZNF180   | -0.108 | 0.033 | 1.10 × 10 <sup>-3</sup> | Transcriptional regulation; viral regulation                                               | Yes                                                                               |
| PPP2R1A  | 0.103  | 0.033 | 1.86 × 10 <sup>-3</sup> | Negative control of cell growth and division                                               | Yes                                                                               |
| ROR1     | -0.101 | 0.033 | 2.34 × 10 <sup>-3</sup> | Development of central nervous system                                                      | NA                                                                                |
| VIT      | -0.100 | 0.033 | 2.45 × 10 <sup>-3</sup> | Cell adhesion and migration                                                                | Yes                                                                               |
| CNTFR    | -0.100 | 0.033 | 2.51 × 10 <sup>-3</sup> | Neuronal cell survival                                                                     | Yes                                                                               |
| EPHB2    | -0.097 | 0.033 | 3.31 × 10 <sup>-3</sup> | Cell division and differentiation                                                          | Yes                                                                               |
| APOE     | 0.161  | 0.055 | 3.39 × 10 <sup>-3</sup> | Lipoprotein metabolism                                                                     | Yes                                                                               |
| GALNT16  | -0.095 | 0.033 | 3.98 × 10 <sup>-3</sup> | Metabolism of proteins                                                                     | Yes                                                                               |
| COLEC11  | -0.094 | 0.033 | 4.37 × 10 <sup>-3</sup> | Innate immune system                                                                       | NA                                                                                |
| TNFRSF21 | -0.091 | 0.033 | 5.75 × 10 <sup>-3</sup> | T helper cell activation, inflammation, immune regulation                                  | NA                                                                                |
| CLMP     | -0.091 | 0.033 | 6.17 × 10 <sup>-3</sup> | Cell-cell adhesion (endothelial, epithelial), adipocyte maturation                         | Yes                                                                               |
| SNRPF    | 0.152  | 0.055 | 6.17 × 10 <sup>-3</sup> | mRNA splicing                                                                              | Yes                                                                               |
| PMEPA1   | 0.090  | 0.033 | 6.46 × 10 <sup>-3</sup> | Negative regulator of TGF-β activity                                                       | Yes                                                                               |

<sup>a</sup> Proteins without available evidence of direct or indirect implication in asthma-related traits or allergic diseases are denoted by NA.

NA: not available; SE; standard error; TGF-β: transforming growth factor β.

Information provided by PhenoScanner v2.

**Table S3 (continuation).** Proteins with expression levels in plasma associated with rs1166980.

| Protein  | Beta   | SE    | <i>p</i> -value         | Function(s)                                                    | Previous association with asthma-related traits or allergic diseases <sup>a</sup> |
|----------|--------|-------|-------------------------|----------------------------------------------------------------|-----------------------------------------------------------------------------------|
| TBXAS1   | -0.090 | 0.033 | 6.46 × 10 <sup>-3</sup> | Drug metabolism, synthesis of cholesterol, steroids and lipids | Yes                                                                               |
| SCGB1D2  | 0.090  | 0.033 | 6.61 × 10 <sup>-3</sup> | Regulation of steroid hormones                                 | Yes                                                                               |
| ERAP1    | -0.151 | 0.056 | 6.67 × 10 <sup>-3</sup> | Blood pressure regulation                                      | NA                                                                                |
| TMEM132A | -0.090 | 0.033 | 6.76 × 10 <sup>-3</sup> | Brain development                                              | Yes                                                                               |
| UNC5A    | -0.090 | 0.033 | 6.92 × 10 <sup>-3</sup> | Axon guidance                                                  | Yes                                                                               |
| NMES1    | 0.089  | 0.033 | 7.08 × 10 <sup>-3</sup> | Squamous cell carcinoma                                        | NA                                                                                |
| APOE3    | 0.148  | 0.055 | 7.18 × 10 <sup>-3</sup> | Lipoprotein metabolism                                         | Yes                                                                               |
| RGMB     | -0.089 | 0.033 | 7.41 × 10 <sup>-3</sup> | Development of nervous system                                  | Yes                                                                               |
| NPPB     | -0.083 | 0.031 | 7.51 × 10 <sup>-3</sup> | Blood pressure regulation                                      | Yes                                                                               |
| RNF149   | -0.088 | 0.033 | 7.94 × 10 <sup>-3</sup> | Ligase and ubiquitin protein transferase                       | Yes                                                                               |
| APOE4    | 0.146  | 0.055 | 8.12 × 10 <sup>-3</sup> | Lipoprotein metabolism                                         | Yes                                                                               |
| KLK14    | -0.088 | 0.033 | 8.13 × 10 <sup>-3</sup> | Blood pressure, desquamation                                   | Yes                                                                               |
| EPOR     | 0.088  | 0.033 | 8.32 × 10 <sup>-3</sup> | Erythroblast proliferation and differentiation                 | Yes                                                                               |
| SLC5A8   | 0.087  | 0.033 | 8.32 × 10 <sup>-3</sup> | Transport of glucose, salts, vitamins                          | NA                                                                                |
| HPGD     | 0.087  | 0.033 | 8.51 × 10 <sup>-3</sup> | Metabolism of prostaglandins, inflammation                     | NA                                                                                |
| EPHA5    | 0.087  | 0.033 | 8.51 × 10 <sup>-3</sup> | Developmental events                                           | NA                                                                                |
| MAGI2    | -0.087 | 0.033 | 8.91 × 10 <sup>-3</sup> | Signaling in neuronal cells                                    | NA                                                                                |
| MGAT2    | 0.086  | 0.033 | 9.33 × 10 <sup>-3</sup> | Glycosylation                                                  | NA                                                                                |
| LAMC2    | -0.086 | 0.033 | 9.55 × 10 <sup>-3</sup> | Cell membrane                                                  | Yes                                                                               |
| LRRC15   | -0.086 | 0.033 | 9.77 × 10 <sup>-3</sup> | Collagen and laminin binding                                   | NA                                                                                |
| TFF3     | 0.086  | 0.033 | 9.77 × 10 <sup>-3</sup> | Mucosa protection                                              | NA                                                                                |

<sup>a</sup> Proteins without available evidence of direct or indirect implication in asthma-related traits or allergic diseases are denoted by NA.

NA: not available; SE; standard error; TGF-β: transforming growth factor β.

Information provided by PhenoScanner v2.



**Table S4.** Proteins with expression levels affected by the SNP rs72891545.

| Protein | Beta   | SE    | <i>p</i> -value         | Function(s)                                                      | Previous association with<br>asthma-related traits or allergic<br>diseases <sup>a</sup> |
|---------|--------|-------|-------------------------|------------------------------------------------------------------|-----------------------------------------------------------------------------------------|
| GFRA1   | 0.522  | 0.148 | 4.07 × 10 <sup>-4</sup> | Neuronal cell survival and differentiation                       | NA                                                                                      |
| RTN4R   | 0.479  | 0.148 | 1.17 × 10 <sup>-3</sup> | Axonal regeneration                                              | Yes                                                                                     |
| GDF11   | 0.453  | 0.148 | 2.19 × 10 <sup>-3</sup> | Ligand of TGF-β                                                  | Yes                                                                                     |
| ERAP2   | 0.449  | 0.148 | 2.34 × 10 <sup>-3</sup> | Innate immune system, generation of HLA class I binding proteins | NA                                                                                      |
| FCN1    | -0.450 | 0.148 | 2.34 × 10 <sup>-3</sup> | Innate immune system                                             | NA                                                                                      |
| SIGLEC9 | 0.450  | 0.148 | 2.34 × 10 <sup>-3</sup> | Innate immune system                                             | Yes                                                                                     |
| COL8A1  | -0.446 | 0.148 | 2.57 × 10 <sup>-3</sup> | Collagen structure                                               | Yes                                                                                     |
| APOF    | -0.444 | 0.148 | 2.69 × 10 <sup>-3</sup> | Transport and sterification of cholesterol                       | Yes                                                                                     |
| TEPSIN  | 0.443  | 0.148 | 2.75 × 10 <sup>-3</sup> | Vesicular trafficking of proteins                                | Yes                                                                                     |
| SLC6A16 | 0.439  | 0.148 | 2.95 × 10 <sup>-3</sup> | Neurotransmitter transporter activity                            | NA                                                                                      |
| PDLIM4  | -0.437 | 0.148 | 3.09 × 10 <sup>-3</sup> | Bone development                                                 | Yes                                                                                     |
| MSTN    | 0.431  | 0.148 | 3.55 × 10 <sup>-3</sup> | Ligand of TGF-β                                                  | NA                                                                                      |
| PLG     | 0.422  | 0.148 | 4.37 × 10 <sup>-3</sup> | Degradation of plasma proteins                                   | Yes                                                                                     |
| BARD1   | -0.417 | 0.148 | 4.79 × 10 <sup>-3</sup> | Control of cell cycle                                            | NA                                                                                      |
| GHR     | 0.404  | 0.148 | 6.31 × 10 <sup>-3</sup> | Growth                                                           | Yes                                                                                     |
| PLK1    | 0.400  | 0.148 | 6.92 × 10 <sup>-3</sup> | Transferase activity                                             | NA                                                                                      |
| SNAP29  | -0.395 | 0.148 | 7.59 × 10 <sup>-3</sup> | Membrane trafficking                                             | Yes                                                                                     |
| LEP     | 0.389  | 0.148 | 8.51 × 10 <sup>-3</sup> | Energy homeostasis                                               | NA                                                                                      |
| LEP     | 0.389  | 0.148 | 8.51 × 10 <sup>-3</sup> | Energy homeostasis                                               | NA                                                                                      |

<sup>a</sup> Proteins without available evidence of direct or indirect implication in asthma-related traits or allergic diseases are denoted by NA.

HLA: human leukocyte antigen; NA: not available; SE: standard error; TGF-β: transforming growth factor β.

Information provided by PhenoScanner v2.

**Table S5.** Genes associated with ICS response by genome-wide association studies published to date.

| Genes associated                                                         | Population                                | Sample size | Age group         | Definition of ICS response        | Reference |
|--------------------------------------------------------------------------|-------------------------------------------|-------------|-------------------|-----------------------------------|-----------|
| <i>UMAD1-GLCCI1</i>                                                      | European                                  | 118         | Children          | % $\Delta$ FEV <sub>1</sub>       | 1         |
| <i>PDE10A-T, HRH4-ZNF521</i>                                             | European                                  | 418         | Children + adults | % $\Delta$ FEV <sub>1</sub>       | 2         |
| <i>ALLC</i>                                                              | Asian                                     | 189         | Adults            | % $\Delta$ FEV <sub>1</sub>       | 3         |
| <i>ZNF432-ZNF841</i>                                                     | European                                  | 581         | Children          | BDR                               | 4         |
| <i>FBXL7</i>                                                             | European                                  | 124         | Children          | Asthma symptoms                   | 5         |
| <i>CMTR1, MAGI2, TRIM24, SHB-ALDH1B1, L3MBTL4-ARHGAP28, ELMO2-ZNF334</i> | European                                  | 369         | Children + adults | Asthma exacerbations              | 6         |
| <i>MMS22L-FBXL4, NAV2-HTATIP2</i>                                        | European                                  | 120         | Adults            | % $\Delta$ FEV <sub>1</sub>       | 7         |
| NA                                                                       | European                                  | 110         | Children          | % $\Delta$ FEV <sub>1</sub> , AHR | 8         |
| NA                                                                       | Multiple<br>(European,<br>admixed, Asian) | 2,672       | Adults            | % $\Delta$ FEV <sub>1</sub>       | 9         |
| <i>EDDM3B</i>                                                            | Admixed                                   | 244         | Children + adults | ACT                               | 10        |

ACT: asthma control test; AHR: airway hyperresponsiveness; BDR: bronchodilator response; ICS: inhaled corticosteroids;  $\Delta$ FEV<sub>1</sub>: change in forced expiratory volume in one second.  
Citations:

1. Tantisira KG, et al. Genome-wide association between *GLCCI1* and response to glucocorticoid therapy in asthma. *N Engl J Med* 2011; 365:1173-1183.
2. Tantisira KG, et al. Genome-wide association identifies the *T* gene as a novel asthma pharmacogenetic locus. *Am J Respir Crit Care Med* 2012; 185:1286-1291.
3. Park TJ, et al. Genome-wide association study identifies *ALLC* polymorphisms correlated with FEV<sub>1</sub> change by corticosteroid. *Clin Chim Acta* 2014; 436:20-26.
4. Wu AC, et al. Inhaled corticosteroid treatment modulates *ZNF432* gene variant's effect on bronchodilator response in asthmatics. *J Allergy Clin Immunol* 2014; 133:723-8 e3.
5. Park HW, et al. Genetic predictors associated with improvement of asthma symptoms in response to inhaled corticosteroids. *J Allergy Clin Immunol* 2014; 133:664-9 e5.
6. Dahlin A, et al. *CMTR1* is associated with increased asthma exacerbations in patients taking inhaled corticosteroids. *Immun Inflamm Dis* 2015; 3:350-359.
7. Wang Y, et al. Pharmacodynamic genome-wide association study identifies new responsive loci for glucocorticoid intervention in asthma. *Pharmacogenomics J* 2015; 15:422-429.
8. Leusink M, et al. Genetic variation in uncontrolled childhood asthma despite ICS treatment. *Pharmacogenomics J* 2016; 16:1158-1163.
9. Mosteller M, et al. No evidence of large genetic effects on steroid response in asthma patients. *J Allergy Clin Immunol* 2017; 139:797-803 e7.
10. Levin AM, et al. Integrative approach identifies corticosteroid response variants in diverse populations with asthma. *J Allergy Clin Immunol* 2019; 143:1791-1802.

**Table S6.** Results of SNP-level replication of previous associations of ICS response in the results of the GWAS of the change in FEV<sub>1</sub> after ICS treatment performed in the SLOVENIA study.

| Nearest gene(s)     | SNP        | Chr. <sup>a</sup> | Position <sup>b</sup> | A1/A2 | Published GWAS of ICS response |                          |                         |          | GWAS of the change in FEV <sub>1</sub> after ICS use (n = 166) |              |
|---------------------|------------|-------------------|-----------------------|-------|--------------------------------|--------------------------|-------------------------|----------|----------------------------------------------------------------|--------------|
|                     |            |                   |                       |       | Definition of ICS response     | OR (95% CI) <sup>c</sup> | p-value                 | Citation | OR (95% CI) <sup>c</sup>                                       | p-value      |
| <i>ALLC</i>         | rs17445240 | 2                 | 3703041               | G/A   | % ΔFEV <sub>1</sub>            | 1.43 (1.25-1.65)         | 5.01 × 10 <sup>-7</sup> | 1        | 1.23 (0.62-2.43)                                               | 0.555        |
|                     | rs13418767 | 2                 | 3704830               | T/G   | % ΔFEV <sub>1</sub>            | 1.40 (1.22-1.62)         | 2.77 × 10 <sup>-6</sup> |          | 1.11 (0.57-2.16)                                               | 0.753        |
|                     | rs6754459  | 2                 | 3707423               | T/C   | % ΔFEV <sub>1</sub>            | 1.43 (1.24-1.65)         | 5.73 × 10 <sup>-7</sup> |          | 1.32 (0.81-2.16)                                               | 0.268        |
|                     | rs17017879 | 2                 | 3713658               | C/G   | % ΔFEV <sub>1</sub>            | 1.40 (1.22-1.61)         | 2.49 × 10 <sup>-6</sup> |          | 1.12 (0.53-2.36)                                               | 0.766        |
|                     | rs7558370  | 2                 | 3714261               | C/A   | % ΔFEV <sub>1</sub>            | 1.39 (1.21-1.60)         | 3.73 × 10 <sup>-6</sup> |          | 1.16 (0.60-2.23)                                               | 0.660        |
|                     | rs11123610 | 2                 | 3723026               | A/G   | % ΔFEV <sub>1</sub>            | 0.69 (0.60-0.80)         | 3.57 × 10 <sup>-7</sup> |          | 0.78 (0.49-1.24)                                               | 0.287        |
| <i>FBXL7</i>        | rs10044254 | 5                 | 15783596              | G/A   | Asthma symptoms                | 3.29 (1.94-5.58)         | 1.02 × 10 <sup>-5</sup> | 2        | 0.84 (0.50-1.42)                                               | 0.511        |
| <i>CMTR1</i>        | rs2395672  | 6                 | 37428577              | G/A   | Asthma exacerbations           | 1.08 (1.04-1.12)         | 1.86 × 10 <sup>-5</sup> | 3        | 1.78 (1.03-3.05)                                               | <b>0.037</b> |
| <i>MMS22L-FBXL4</i> | rs6924808  | 6                 | 98358575              | A/G   | % ΔFEV <sub>1</sub>            | NA                       | 5.31 × 10 <sup>-7</sup> | 4        | 0.95 (0.61-1.50)                                               | 0.841        |
| <i>PDE10A-T</i>     | rs6456042  | 6                 | 166534742             | C/A   | % ΔFEV <sub>1</sub>            | NA                       | 6.67 × 10 <sup>-6</sup> | 5        | 0.78 (0.49-1.23)                                               | 0.282        |
|                     | rs3127412  | 6                 | 166535561             | T/C   | % ΔFEV <sub>1</sub>            | NA                       | 9.68 × 10 <sup>-6</sup> |          | 0.78 (0.49-1.23)                                               | 0.282        |
|                     | rs1134481  | 6                 | 166571164             | G/T   | % ΔFEV <sub>1</sub>            | NA                       | NA                      |          | 0.87 (0.56-1.35)                                               | 0.524        |
|                     | rs2305089  | 6                 | 166579270             | T/C   | % ΔFEV <sub>1</sub>            | NA                       | NA                      |          | 0.86 (0.54-1.36)                                               | 0.520        |
|                     | rs3099266  | 6                 | 166581147             | C/T   | % ΔFEV <sub>1</sub>            | NA                       | NA                      |          | 0.94 (0.60-1.48)                                               | 0.801        |

<sup>a</sup>Chromosome; <sup>b</sup>Positions based on GRCh37/hg19 build; <sup>c</sup>Odds ratio for the effect alleles.

A1: Effect allele; A2: Non-effect allele; ACT: asthma control test; BDR: bronchodilator response; CI: Confidence Interval; GWAS: genome-wide association study; ICS: inhaled corticosteroids; NA: not available; SNP: single-nucleotide polymorphism; ΔFEV<sub>1</sub>: change in forced expiratory volume in one second. SNPs with evidence of replication in European populations are in boldface.

Citations:

1. Park TJ, *et al.* Genome-wide association study identifies *ALLC* polymorphisms correlated with FEV<sub>1</sub> change by corticosteroid. Clin Chim Acta 2014; 436:20-26.
2. Park HW, *et al.* Genetic predictors associated with improvement of asthma symptoms in response to inhaled corticosteroids. J Allergy Clin Immunol 2014; 133:664-9 e5.
3. Dahlin A, *et al.* *CMTR1* is associated with increased asthma exacerbations in patients taking inhaled corticosteroids. Immun Inflamm Dis 2015; 3:350-359.
4. Wang Y, *et al.* Pharmacodynamic genome-wide association study identifies new responsive loci for glucocorticoid intervention in asthma. Pharmacogenomics J 2015; 15:422-429.
5. Tantisira KG, *et al.* Genome-wide association identifies the *T* gene as a novel asthma pharmacogenetic locus. Am J Respir Crit Care Med 2012; 185:1286-1291.

**Table S6 (continuation).** Results of SNP-level replication of previous associations of ICS response in the results of the GWAS of the change in FEV<sub>1</sub> after ICS treatment performed in the SLOVENIA study.

| Nearest gene(s)         | SNP        | Chr. <sup>a</sup> | Position <sup>b</sup> | E/NE | Published GWAS of ICS response |                          |                         |          | GWAS of the change in FEV <sub>1</sub> after ICS use (n = 166) |                               |
|-------------------------|------------|-------------------|-----------------------|------|--------------------------------|--------------------------|-------------------------|----------|----------------------------------------------------------------|-------------------------------|
|                         |            |                   |                       |      | Definition of ICS response     | OR (95% CI) <sup>c</sup> | p – value               | Citation | OR (95% CI) <sup>c</sup>                                       | p – value                     |
| <i>UMAD1-GLCCI1</i>     | rs37972    | 7                 | 8007509               | C/T  | % ΔFEV <sub>1</sub>            | NA                       | 0.010                   | 6        | 0.97 (0.63 – 1.48)                                             | 0.876                         |
| <i>MAGI2</i>            | rs2691529  | 7                 | 77803275              | T/C  | Asthma exacerbations           | 0.97 (0.94 – 1.00)       | 0.051                   | 3        | 1.01 (0.57 – 1.81)                                             | 0.966                         |
| <i>TRIM24</i>           | rs6467778  | 7                 | 138178222             | G/A  | Asthma exacerbations           | 1.01 (1.00 – 1.03)       | 0.021                   | 3        | 0.67 (0.39 – 1.16)                                             | 0.151                         |
| <i>SHB-ALDH1B1</i>      | rs4271056  | 9                 | 38232043              | C/T  | Asthma exacerbations           | 0.96 (0.93 – 0.99)       | 6.71 × 10 <sup>-3</sup> | 3        | 1.16 (0.66 – 2.03)                                             | 0.615                         |
| <i>NAV2-HTATIP2</i>     | rs1353649  | 11                | 20253599              | G/A  | % ΔFEV <sub>1</sub>            | NA                       | 3.92 × 10 <sup>-9</sup> | 4        | 0.83 (0.51 – 1.35)                                             | 0.444                         |
| <i>EDDM3B</i>           | rs3827907  | 14                | 21238798              | C/T  | ACT                            | NA                       | 7.79 × 10 <sup>-8</sup> | 7        | 0.52 (0.32 – 0.84)                                             | <b>7.40 × 10<sup>-3</sup></b> |
| <i>L3MBTL4-ARHGAP28</i> | rs9303988  | 18                | 6667583               | C/T  | Asthma exacerbations           | 1.03 (1.00 – 1.05)       | 0.012                   | 3        | 1.30 (0.81 – 2.11)                                             | 0.279                         |
| <i>HRH4-ZNF521</i>      | rs9955411  | 18                | 22074720              | T/A  | % ΔFEV <sub>1</sub>            | NA                       | 1.28 × 10 <sup>-4</sup> | 5        | 0.94 (0.56 – 1.58)                                             | 0.814                         |
| <i>ZNF432-ZNF841</i>    | rs3752120  | 19                | 52552021              | T/C  | BDR                            | 1.03 (1.02 – 1.05)       | 4.58 × 10 <sup>-6</sup> |          | 0.97 (0.55 – 1.71)                                             | 0.917                         |
|                         | rs3450     | 19                | 52552999              | C/T  | BDR                            | 1.03 (1.02 – 1.04)       | 1.93 × 10 <sup>-6</sup> | 8        | 0.89 (0.52 – 1.54)                                             | 0.681                         |
|                         | rs12460587 | 19                | 52586919              | G/T  | BDR                            | 1.04 (1.02 – 1.05)       | 5.69 × 10 <sup>-7</sup> |          | 0.98 (0.56 – 1.73)                                             | 0.948                         |
| <i>ELMO2-ZNF334</i>     | rs279728   | 20                | 45080421              | T/C  | Asthma exacerbations           | 1.02 (1.01 – 1.03)       | 6.45 × 10 <sup>-3</sup> | 3        | 2.59 (0.96 – 6.99)                                             | 0.061                         |

<sup>a</sup>Chromosome; <sup>b</sup>Positions based on GRCh37/hg19 build; <sup>c</sup>Odds ratio for the effect alleles.

ACT: asthma control test; BDR: bronchodilator response; CI: Confidence Interval; E: Effect allele; GWAS: genome-wide association study; ICS: inhaled corticosteroids; NA: not available; NE: Non-effect allele; SNP: single-nucleotide polymorphism; ΔFEV<sub>1</sub>: change in forced expiratory volume in one second.

Citations:

6. Tantisira KG, *et al.* Genome-wide association between *GLCCI1* and response to glucocorticoid therapy in asthma. *N Engl J Med* 2011; 365:1173-1183.

7. Levin AM, *et al.* Integrative approach identifies corticosteroid response variant in diverse populations with asthma. *J Allergy Clin Immunol* 2019;143:1791-1802.

8. Wu AC, *et al.* Inhaled corticosteroid treatment modulates *ZNF432* gene variant's effect on bronchodilator response in asthmatics. *J Allergy Clin Immunol* 2014; 133:723-8 e3.

Significant *p*-values are in boldface.

**Table S7.** Genomic-region replication of previous associations of ICS response. Evidence of association with the  $\Delta FEV_1$  after ICS treatment in asthmatic patients.

| Gene                | # SNPs tested | # Independent signals | Bonferroni $p$ -value threshold | Significant SNPs after Bonferroni-like correction | SNP min $p$ -value | A1/A2 | OR (95% CI) <sup>a</sup> | $p$ -value                              |
|---------------------|---------------|-----------------------|---------------------------------|---------------------------------------------------|--------------------|-------|--------------------------|-----------------------------------------|
| <i>ALLC</i>         | 970           | 112                   | $4.48 \times 10^{-4}$           | NA                                                | rs11538545         | C/G   | 1.20 (0.71-2.05)         | 0.496                                   |
| <i>FBXL7</i>        | 1251          | 69                    | $7.19 \times 10^{-4}$           | NA                                                | rs1019810          | G/A   | 0.46 (0.28-0.77)         | $2.88 \times 10^{-3}$                   |
| <i>CMTR1</i>        | 588           | 31                    | $1.61 \times 10^{-3}$           | NA                                                | rs56242039         | C/G   | 0.30 (0.14-0.67)         | $3.40 \times 10^{-3}$                   |
| <i>MMS22L-FBXL4</i> | 4218          | 100                   | $5.01 \times 10^{-4}$           | NA                                                | rs1206129          | A/G   | 0.50 (0.31-0.80)         | $3.77 \times 10^{-3}$                   |
| <i>PDE10A-T</i>     | 3872          | 138                   | $3.63 \times 10^{-4}$           | rs9365939                                         | rs9365939          | G/A   | 0.41 (0.26-0.65)         | <b><math>1.92 \times 10^{-4}</math></b> |
|                     |               |                       |                                 | rs2118353                                         | rs2118353          | T/C   | 0.41 (0.26-0.65)         | <b><math>1.92 \times 10^{-4}</math></b> |
| <i>UMAD1-GLCCI1</i> | 2508          | 196                   | $2.55 \times 10^{-4}$           | NA                                                | rs200043140        | A/G   | 0.23 (0.10-0.52)         | $3.98 \times 10^{-4}$                   |
| <i>MAGI2</i>        | 5798          | 415                   | $1.21 \times 10^{-4}$           | NA                                                | rs17417090         | C/T   | 2.51 (1.44-4.37)         | $1.20 \times 10^{-3}$                   |
| <i>TRIM24</i>       | 796           | 29                    | $1.74 \times 10^{-3}$           | NA                                                | rs17837468         | G/A   | 0.40 (0.19-0.86)         | 0.018                                   |
| <i>SHB-ALDH1B1</i>  | 2009          | 18                    | $2.75 \times 10^{-3}$           | NA                                                | rs3808862          | A/G   | 1.99 (1.25-3.15)         | $3.42 \times 10^{-3}$                   |
|                     |               |                       |                                 | NA                                                | rs7047650          | C/G   | 1.99 (1.25-3.15)         | $3.42 \times 10^{-3}$                   |
|                     |               |                       |                                 | NA                                                | rs4878179          | T/C   | 1.99 (1.25-3.15)         | $3.42 \times 10^{-3}$                   |
|                     |               |                       |                                 | NA                                                | rs10814650         | G/A   | 1.99 (1.25-3.15)         | $3.42 \times 10^{-3}$                   |
|                     |               |                       |                                 | NA                                                | rs10814651         | T/C   | 1.99 (1.25-3.15)         | $3.42 \times 10^{-3}$                   |

<sup>a</sup>Odds ratio for the effect alleles. A1: Effect allele; A2: Non-effect allele; CI: Confidence Interval; ICS: inhaled corticosteroids; NA: not available; SNP: single-nucleotide polymorphism;  $\Delta FEV_1$ : change in forced expiratory volume in one second.

Significant  $p$ -values after multiple comparison adjustment are in boldface.

**Table S7 (continuation).** Genomic-region replication of previous associations of ICS response. Evidence of association with the  $\Delta FEV_1$  after ICS treatment in asthmatic patients.

| Gene                    | # SNPs tested | # Independent signals | Bonferroni <i>p</i> -value threshold | Significant SNPs after Bonferroni-like correction | SNP min <i>p</i> -value | A1/A2 | OR (95% CI) <sup>a</sup> | <i>p</i> -value         |
|-------------------------|---------------|-----------------------|--------------------------------------|---------------------------------------------------|-------------------------|-------|--------------------------|-------------------------|
| <i>NAV2-HTATIP2</i>     | 2694          | 114                   | 4.36 × 10 <sup>-4</sup>              | NA                                                | rs73429709              | C/T   | 2.55 (1.42-4.57)         | 1.63 × 10 <sup>-3</sup> |
| <i>EDDM3B</i>           | 912           | 84                    | 5.97 × 10 <sup>-4</sup>              | NA                                                | rs57736800              | G/A   | 0.49 (0.30-0.80)         | 4.17 × 10 <sup>-3</sup> |
|                         |               |                       |                                      | NA                                                | rs61552195              | C/T   | 0.49 (0.30-0.80)         | 4.17 × 10 <sup>-3</sup> |
| <i>L3MBTL4-ARHGAP28</i> | 3434          | 135                   | 3.70 × 10 <sup>-4</sup>              | NA                                                | rs8083583               | T/C   | 0.45 (0.27-0.78)         | 4.11 × 10 <sup>-3</sup> |
| <i>HRH4-ZNF521</i>      | 2983          | 147                   | 3.39 × 10 <sup>-4</sup>              | NA                                                | rs11877115              | C/T   | 2.34 (1.24-4.42)         | 8.43 × 10 <sup>-3</sup> |
| <i>ZNF432-ZNF841</i>    | 875           | 57                    | 8.76 × 10 <sup>-4</sup>              | NA                                                | rs111463681             | T/C   | 3.33 (1.36-8.13)         | 8.42 × 10 <sup>-3</sup> |
| <i>ELMO2-ZNF334</i>     | 709           | 83                    | 6.02 × 10 <sup>-4</sup>              | NA                                                | rs76086573              | C/A   | 0.12 (0.03-0.58)         | 8.03 × 10 <sup>-3</sup> |

<sup>a</sup>Odds ratio for the effect alleles. A1: Effect allele; A2: Non-effect allele; CI: Confidence Interval; ICS: inhaled corticosteroids; NA: not available; SNP: single-nucleotide polymorphism;  $\Delta FEV_1$ : change in forced expiratory volume in one second.

Significant *p*-values after multiple comparison adjustment are in boldface.

## Supplementary figure legends

**Figure S1. Quantile-quantile plot of association results of ICS response measured as the binary outcome related to the change in FEV<sub>1</sub> after ICS treatment.** The logarithmic transformation of the observed and expected association results ( $-\log_{10} p$ -value) is represented on the  $y$ -axis and  $x$ -axis, respectively ( $\lambda_{GC} = 1.00$ ).

**Figure S2. Regional plot of association results with asthma exacerbations despite ICS use in European children and young adults.** The  $y$ -axis represents the logarithmic transformation of the association results ( $-\log_{10} p$ -value) by chromosome position ( $x$ -axis) for each SNP as a dot. The most significant variant after Bonferroni-like correction is represented by a diamond (rs72891545). The remaining SNPs are color-coded based on pairwise linkage disequilibrium ( $r^2$  values) with that SNP for European populations from 1KGP (GRCh37/hg19 build).

Figure S1

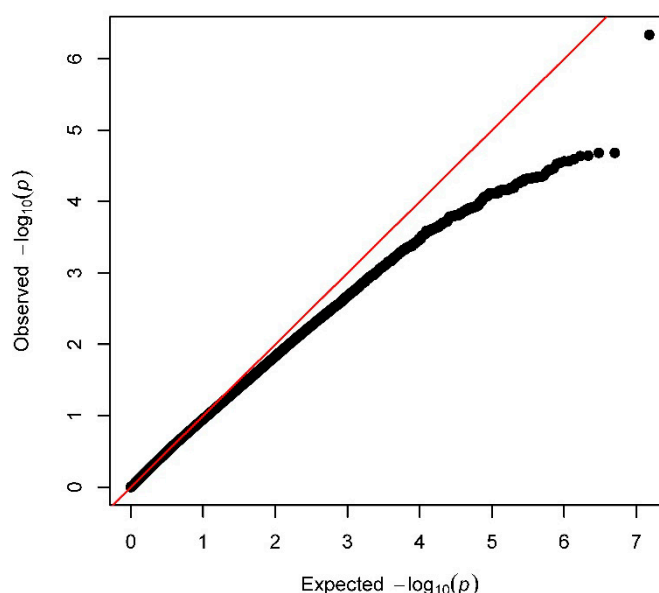

Figure S2

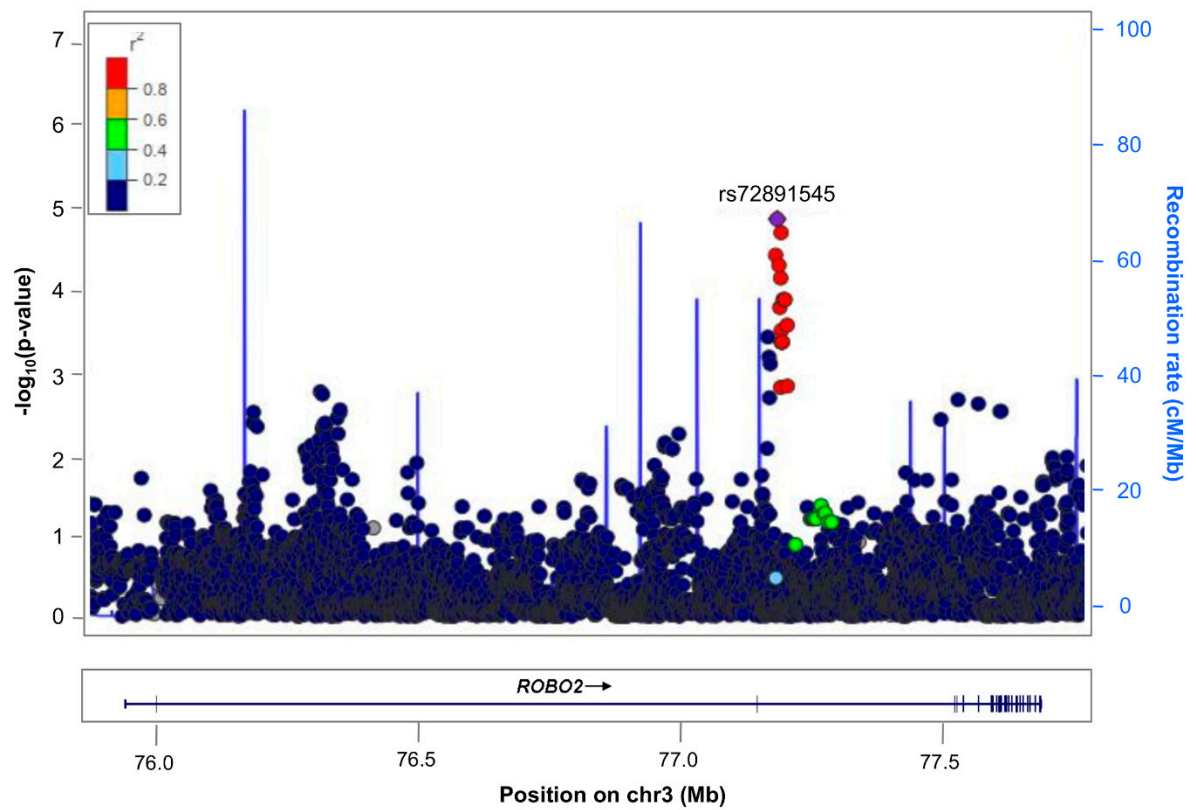

Supplement: s1 [file s1]
